# Supplementary material
Source: HighWire-hosted journal article supplement (https://dmd.aspetjournals.org/highwire/filestream/65970/field_highwire_adjunct_files/2/DMD35113Sup_table2.pdf)
Supplement: DMD35113Sup_table2.pdf [file DMD35113Sup_table2.pdf]

## **Drug Metabolism and Disposition**

### **A PREDICTIVE LIGAND-BASED BAYESIAN MODEL FOR HUMAN DRUG INDUCED LIVER INJURY**

Sean Ekins, Antony J. Williams and Jinghai J. Xu

Collaborations in Chemistry, 601 Runnymede Avenue, Jenkintown, PA 19046, U.S.A. (SE)

Department of Pharmaceutical Sciences, University of Maryland, MD 21201, U.S.A. (SE)

Department of Pharmacology, University of Medicine & Dentistry of New Jersey (UMDNJ)-Robert Wood Johnson Medical School,  
675 Hoes Lane, Piscataway, NJ 08854. (SE)

Royal Society of Chemistry, 904 Tamaras Circle, Wake Forest, NC-27587. (AJW)

Merck & Co., Inc., 126 E. Lincoln Ave, Rahway, NJ 07065. (JJX)

**Supplemental Table 2. Subset of compounds of most interest. False =DILI negative (0), True = DILI Positive (1).**

| <b>Compound Name</b> | <b>DILI Bayesian Prediction</b> | <b>Human</b>                             | <b>DILI</b>                | <b>DILI</b>                             | <b>DILI Bayesian Closest Sample</b> | <b>True Positive</b> | <b>True Negative</b> | <b>False Positive</b> | <b>False Negative</b> |
|----------------------|---------------------------------|------------------------------------------|----------------------------|-----------------------------------------|-------------------------------------|----------------------|----------------------|-----------------------|-----------------------|
|                      |                                 | <b>DILI Bin (1=positive; 0=negative)</b> | <b>DILI Bayesian score</b> | <b>DILI Bayesian Closest Similarity</b> |                                     |                      |                      |                       |                       |
| Alpidem              | TRUE                            | 1                                        | 2.69                       | 0.31                                    | Sample 249                          | 1                    |                      |                       |                       |
| Benoxaprofen         | TRUE                            | 1                                        | 4.55                       | 0.57                                    | Sample 126                          | 1                    |                      |                       |                       |
| Bromfenac            | TRUE                            | 1                                        | 2.50                       | 0.48                                    | Sample 295                          | 1                    |                      |                       |                       |
| Candesartan          | FALSE                           | 0                                        | -6.75                      | 0.37                                    | Sample 270                          |                      | 1                    |                       |                       |
| Ciglitizone          | FALSE                           | 1                                        | -8.23                      | 0.48                                    | Sample 27                           |                      |                      |                       | 1                     |
| Dilevalol            | TRUE                            | 1                                        | 2.74                       | 1.00                                    | Sample 157                          |                      |                      |                       |                       |
| Entacapone           | TRUE                            | 0                                        | 3.84                       | 0.32                                    | Sample 204                          |                      |                      | 1                     |                       |
| Flunoxaprofen        | TRUE                            | 0                                        | 2.11                       | 0.57                                    | Sample 126                          |                      |                      | 1                     |                       |
| Ibuprofen            | FALSE                           | 1                                        | -3.01                      | 0.43                                    | Sample 53                           |                      |                      |                       | 1                     |

|                |       |   |        |      |            |   |   |   |
|----------------|-------|---|--------|------|------------|---|---|---|
| Ibuprofen      | FALSE | 0 | -0.81  | 0.50 | Sample 126 |   | 1 |   |
| Irbesartan     | FALSE | 0 | -5.62  | 0.24 | Sample 227 |   | 1 |   |
| Ketoprofen     | TRUE  | 0 | 7.35   | 0.55 | Sample 126 |   |   | 1 |
| Losartan       | FALSE | 1 | -8.59  | 0.29 | Sample 270 |   |   | 1 |
| Lumiracoxib    | TRUE  | 1 | 5.33   | 0.55 | Sample 173 | 1 |   |   |
| Pemoline       | TRUE  | 1 | 0.29   | 0.41 | Sample 115 | 1 |   |   |
| Pirprofen      | TRUE  | 1 | 3.65   | 0.54 | Sample 126 | 1 |   |   |
| Tasosartan     | FALSE | 1 | -2.87  | 0.24 | Sample 197 |   |   | 1 |
| Tolcapone      | TRUE  | 1 | 7.71   | 0.35 | Sample 162 | 1 |   |   |
| Troleandomycin | FALSE | 1 | -14.09 | 0.46 | Sample 106 |   |   | 1 |
| Ximelagatran   | FALSE | 1 | -1.55  | 0.35 | Sample 165 |   |   | 1 |
| Zolpidem       | TRUE  | 0 | 1.19   | 0.28 | Sample 281 |   |   | 1 |
| Azithromycin   | FALSE | 0 | -16.25 | 0.80 | Sample 105 |   | 1 |   |
| Buspirone      | FALSE | 0 | -3.12  | 0.29 | Sample 258 |   | 1 |   |
| Diclofenac     | TRUE  | 1 | 5.69   | 0.56 | Sample 173 | 1 |   |   |

|               |       |   |        |      |            |    |    |   |   |
|---------------|-------|---|--------|------|------------|----|----|---|---|
| Nefazodone    | TRUE  | 1 | 3.73   | 0.67 | Sample 283 | 1  |    |   |   |
| Pioglitazone  | FALSE | 0 | -5.14  | 0.40 | Sample 27  |    | 1  |   |   |
| Propranolol   | FALSE | 0 | -9.58  | 0.64 | Sample 232 |    | 1  |   |   |
| Rosiglitazone | FALSE | 0 | -1.96  | 0.35 | Sample 27  |    | 1  |   |   |
| Telithromycin | FALSE | 1 | -6.25  | 0.39 | Sample 105 |    |    |   | 1 |
| Troglitazone  | FALSE | 1 | -2.52  | 0.37 | Sample 27  |    |    |   | 1 |
| Valsartan     | FALSE | 0 | -2.26  | 0.32 | Sample 250 |    | 1  |   |   |
| Sudoxicam     | TRUE  | 1 | 2.33   | 0.35 | Sample 45  | 1  |    |   |   |
| Meloxicam     | TRUE  | 0 | 10.07  | 0.64 | Sample 233 |    |    | 1 |   |
| Olmesartan    | FALSE | 0 | -12.75 | 0.32 | Sample 270 |    | 1  |   |   |
| Celecoxib     | TRUE  | 1 | 6.15   | 0.31 | Sample 160 | 1  |    |   |   |
| Lapatinib     | TRUE  | 1 | 5.78   | 0.31 | Sample 138 | 1  |    |   |   |
| Gefitinib     | TRUE  | 1 | 5.51   | 0.37 | Sample 18  | 1  |    |   |   |
| Sum           |       |   |        |      |            | 13 | 10 | 5 | 8 |
